# Supplementary material for: A gas-phase alkali-halide-assisted stable precursor supplied from zirconium carbide for the synthesis of 2D large-sized ZrS2 nanosheets
Source: Royal Society of Chemistry journal article supplement (doi:10.1039/d4tc02834a), 2024-01-01
Supplement: d4tc02834a1.pdf [file d4tc02834a1.pdf]

## **Gas-phase alkali halide assisted stable precursor supply from zirconium carbide for the synthesis of 2D large-sized ZrS<sub>2</sub> nanosheets**

Xuehao Guo<sup>a,b,c</sup>, Xiulian Fan<sup>c</sup>, Xilong Zhou<sup>c</sup>, Wenlong Chu<sup>c</sup>, Chenyang Niu<sup>c</sup>, Liqi He<sup>c</sup>, Shizhen Bin<sup>a,d,\*</sup>, Yu Zhou<sup>c,e</sup>

a. Radiotherapy Center, Third Xiangya Hospital of Central South University, Changsha, 410013, China

b. Guangdong Institute of Semiconductor Micro-Nano Manufacturing Technology, Foshan, Guangdong 528000, China

c. School of Physics, Hunan Key Laboratory of Nanophotonics and Devices, Central South University, 932 South Lushan Road, Changsha, Hunan 410083, P. R. China

d. State Key Laboratory of High Performance Complex Manufacturing, College of Mechanical and Electrical Engineering, Central South University, Changsha, 410083, China

e. State Key Laboratory of Powder Metallurgy, Central South University, Changsha, Hunan 410083, P. R. China

Author to whom correspondence should be addressed: shizhenbin@csu.edu.cn;

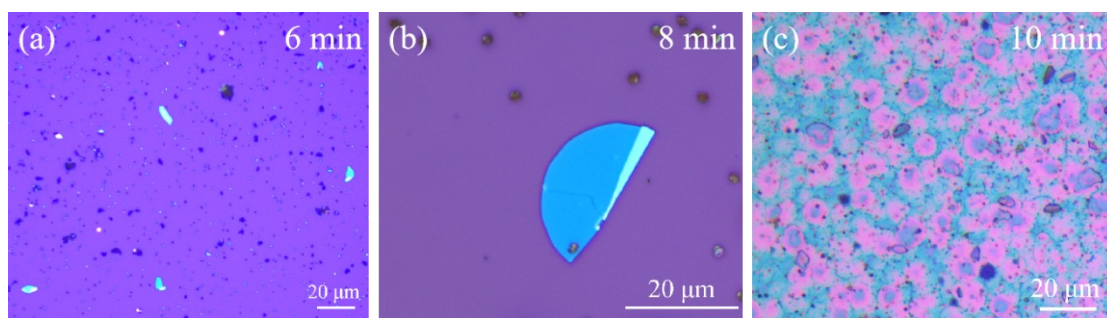

Figure S1. Optical micrographs of morphological changes in  $\text{ZrS}_2$  nanosheets at different growth times.

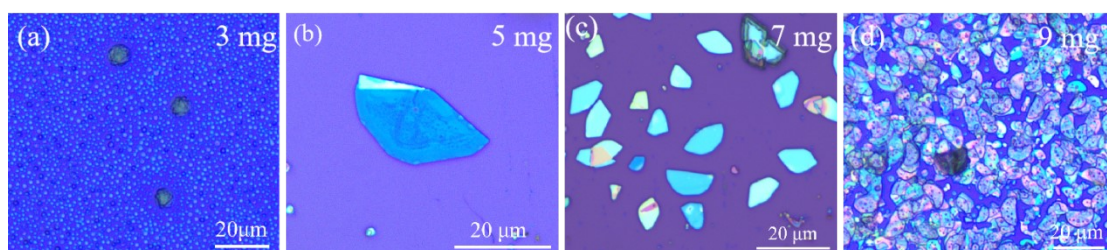

Figure S2. Optical micrographs of  $\text{NaCl}$  of different masses on the growth of  $\text{ZrS}_2$  nanosheets.

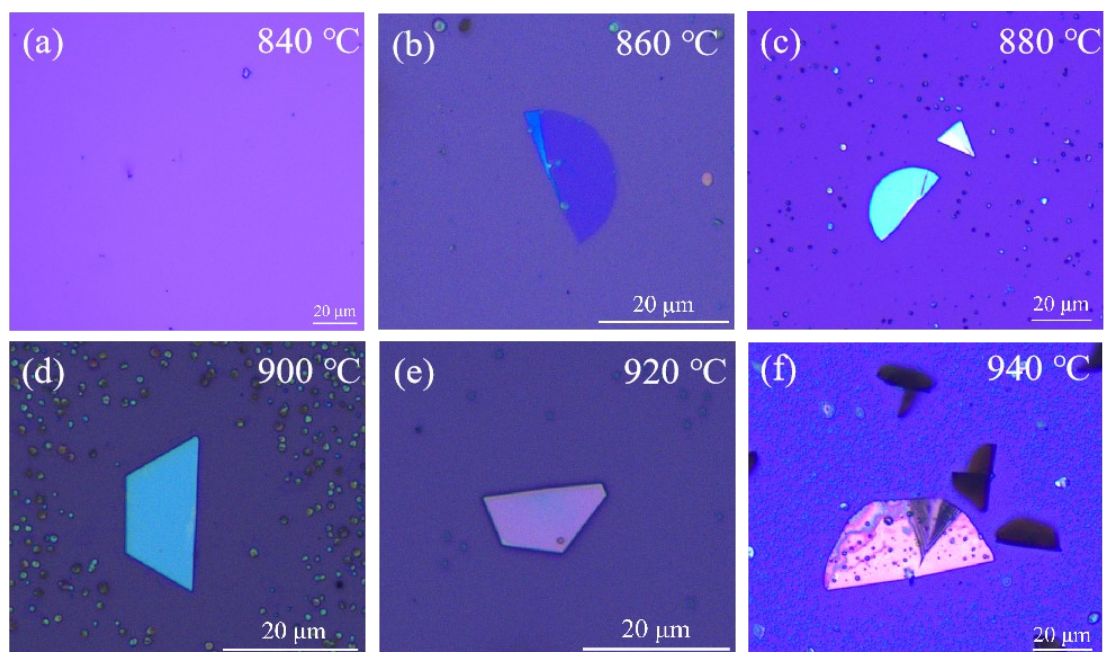

Figure S3. Optical micrographs of  $\text{ZrS}_2$  nanosheets at different growth temperatures.

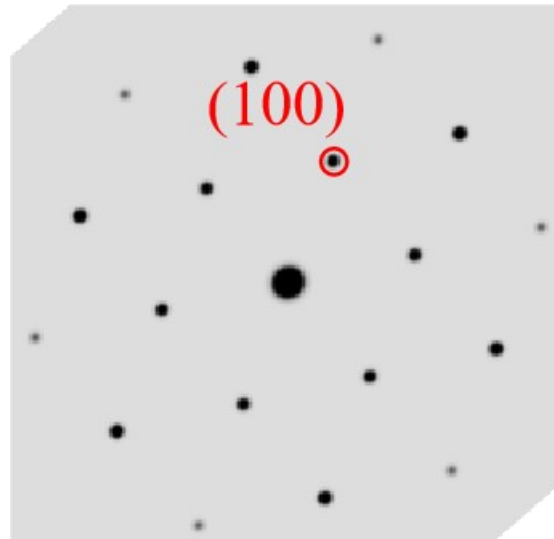

Figure S4. Selected electron diffraction patterns simulated along the [001] direction.

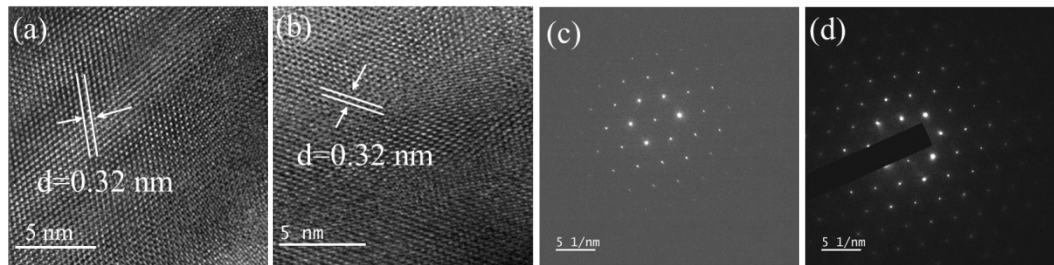

Figure S5. The high-resolution TEM patterns and the SAED patterns of other regions of this ZrS<sub>2</sub> nanosheet.

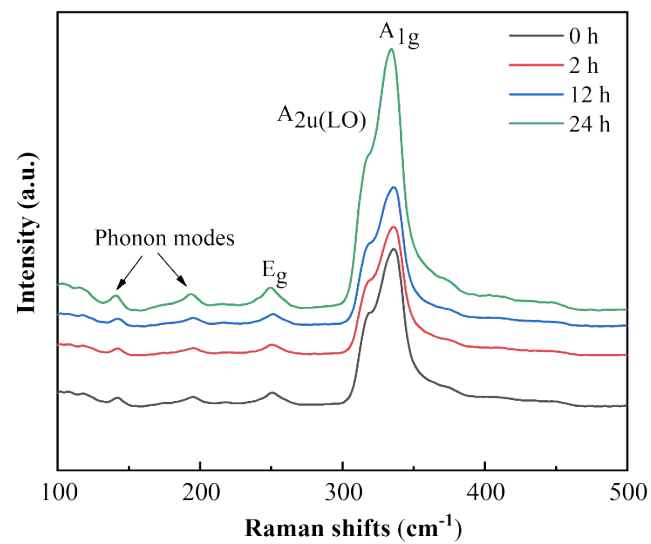

Figure S6. Raman spectra of ZrS<sub>2</sub> nanosheets in air at different times.

Table S1 Performance comparison of FETs based on ZrS<sub>2</sub>.

| Ref.      | The carrier mobility                                                      | The on/off ratio                  | substrate           |
|-----------|---------------------------------------------------------------------------|-----------------------------------|---------------------|
| 1         | 0.01-5 cm <sup>2</sup> ·V <sup>-1</sup> ·s <sup>-1</sup>                  | ~10 <sup>5</sup>                  | h-BN                |
| 2         | 0.1-1.1 cm <sup>2</sup> ·V <sup>-1</sup> ·s <sup>-1</sup>                 | -                                 | h-BN                |
| 3         | 0.1-0.8 cm <sup>2</sup> ·V <sup>-1</sup> ·s <sup>-1</sup>                 | -                                 | Si/SiO <sub>2</sub> |
| This work | 2.03 × 10 <sup>-3</sup> cm <sup>2</sup> ·V <sup>-1</sup> ·s <sup>-1</sup> | ~10 <sup>2</sup> -10 <sup>3</sup> | Si/SiO <sub>2</sub> |

1. Y. M. Zhu, X. S. Wang, M. Zhang, C. Z. Cai and L. M. Xie, *Nano Research* **9** (10), 2931-2937 (2016).
2. M. Zhang, Y. M. Zhu, X. S. Wang, Q. L. Feng, S. L. Qiao, W. Wen, Y. F. Chen, M. H. Cui, J. Zhang, C. Z. Cai and L. M. Xie, *Journal of the American Chemical Society* **137** (22), 7051-7054 (2015).
3. X. T. Wang, L. Huang, X. W. Jiang, Y. Li, Z. M. Wei and J. B. Li, *Journal of Materials Chemistry C* **4** (15), 3143-3148 (2016).
